# Supplementary material
Source: PubMed Central journal article supplement (PMC6950772)
Supplement: mmc1.pdf [file mmc1.pdf]

**Biophysical Journal, Volume 118**

**Supplemental Information**

**Insights on the Conformational Ensemble of Cyt C Reveal a Compact State during Peroxidase Activity**

**Emily E. Chea, Daniel J. Deredge, and Lisa M. Jones**

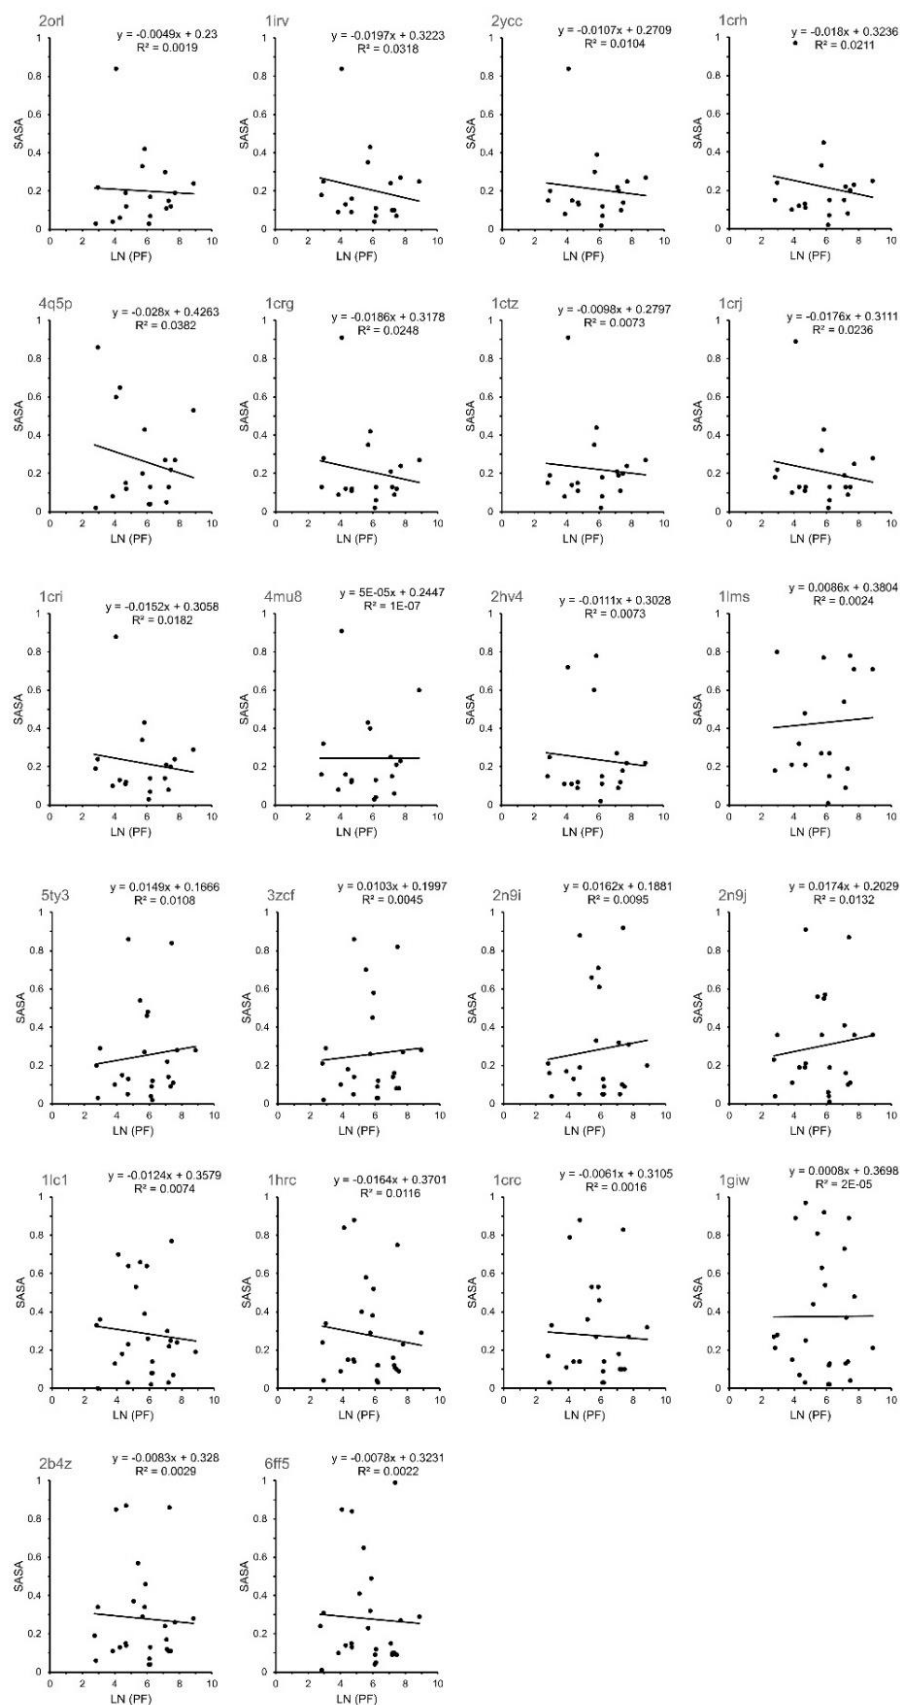

Figure S1. Several protection factor calculations show the SASA values from several cyt c structures do not correlate well with the FPOP modifications on cyt c suggesting there are multiple conformers in solution.

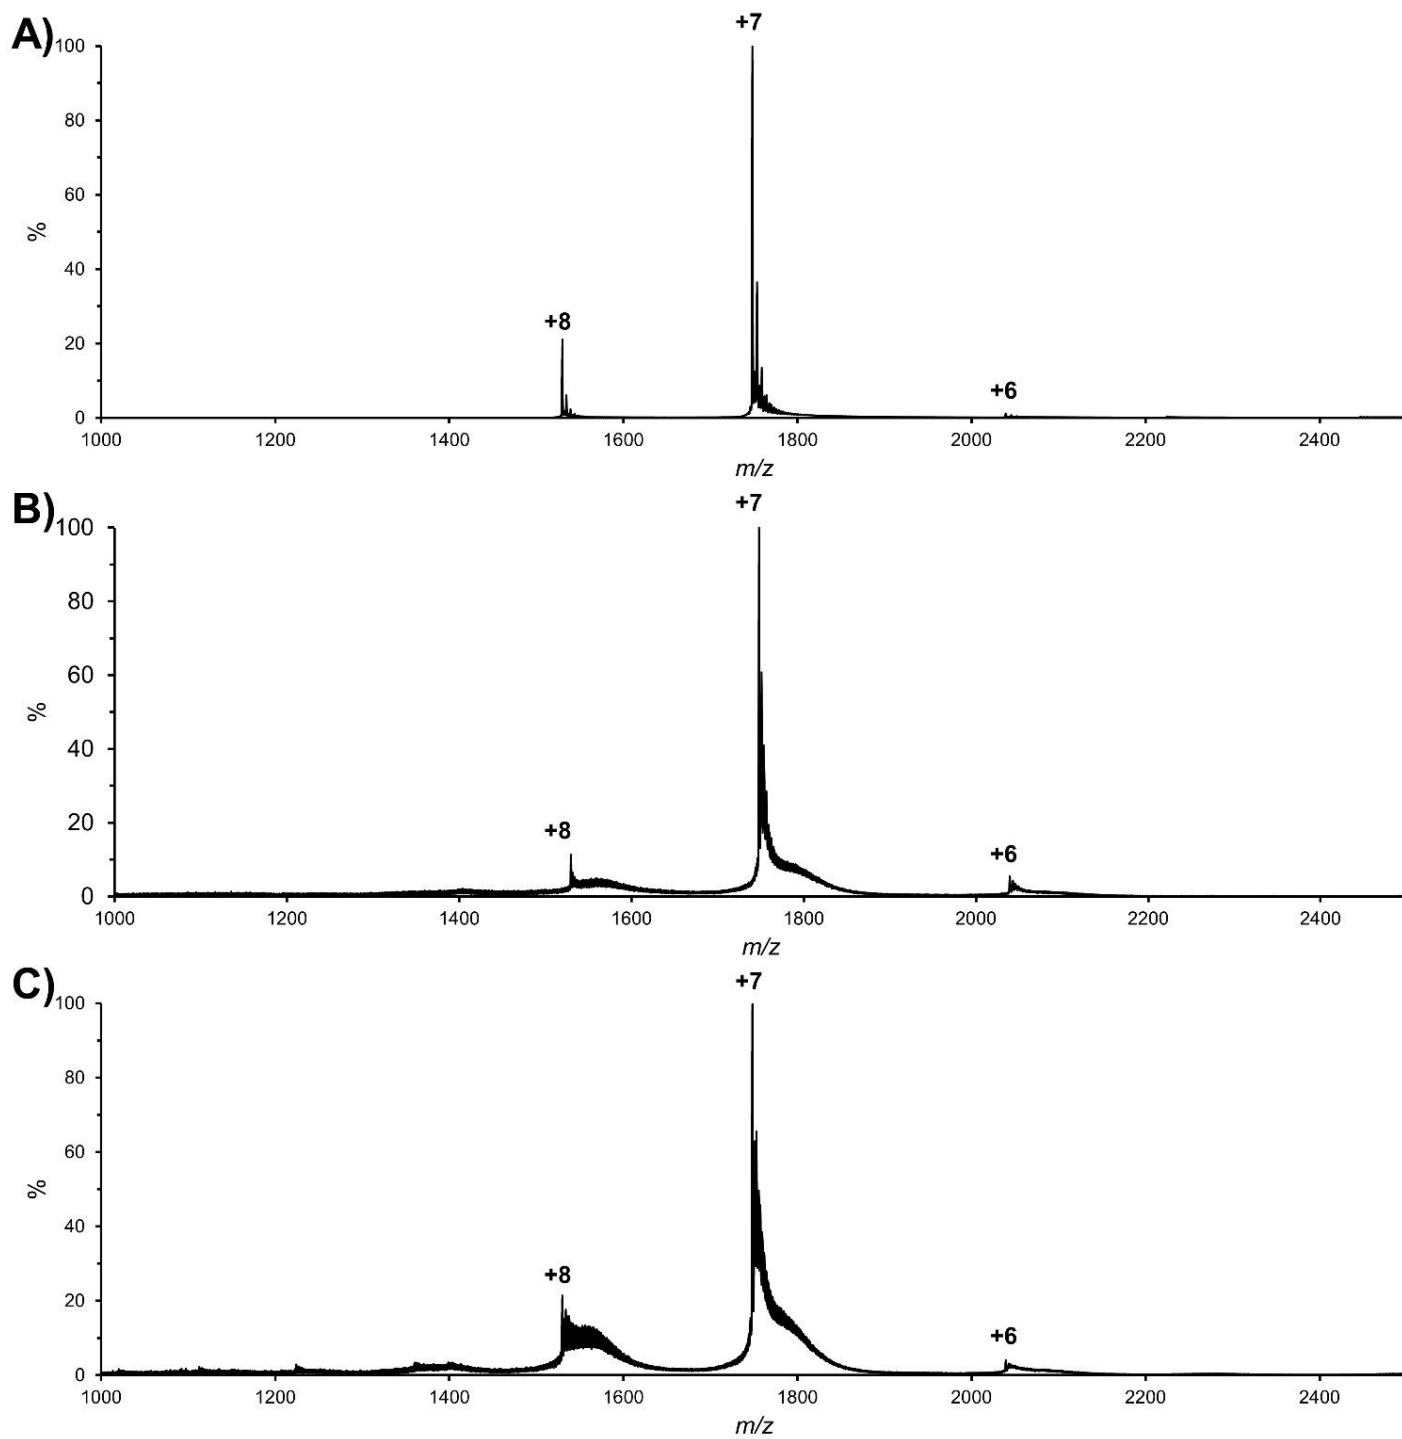

Figure S2. (A) Mass spectra of cyt c control in 100 mM ammonium acetate, (B) mass spectra with the addition of hydrogen peroxide, (C) and the mass spectra after laser irradiation.

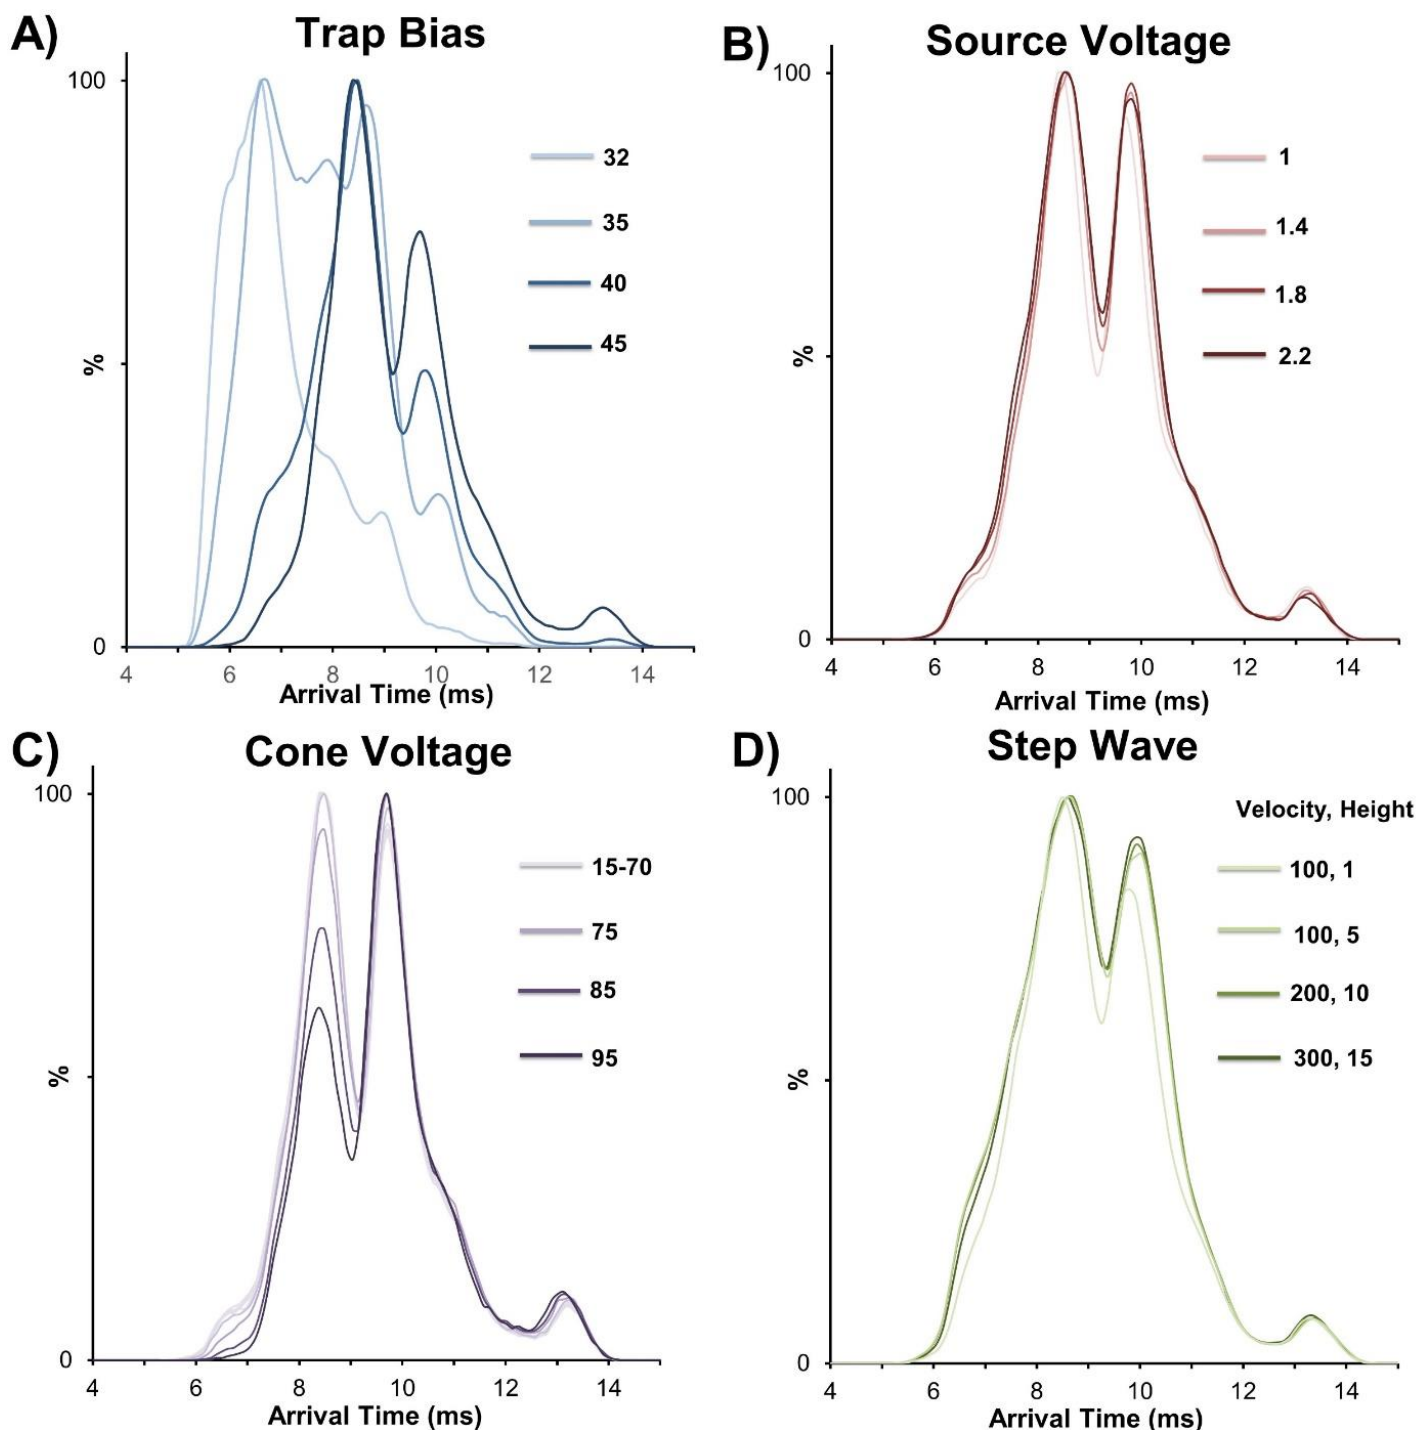

Figure S3: Changes in the trap bias (A), source voltage (B), cone voltage (C), and step wave (D) all show the 7+ charge state of cyt c with multiple conformers. (A) The largest difference is observed with changes in the trap bias. Below a trap bias of 45 major signal reduction is observed. No signal remains with a trap bias below 32. Each trap bias setting tested all retained multiple conformers after IMS. For all other experiments, a trap bias of 45 is used. (B) The arrival time distributions show minimal differences using a source voltage between 1-2.2 kV. All other experiments use a source voltage of 1.8 kV. (C) The arrival time distribution of conformers remain constant with the cone voltage set between 15-70 V followed by a steady decrease in the compact conformer with further increased cone voltage. All other experiments use a cone voltage of 40 V. (D) Changes in the step wave velocity and height show minimal effects on the arrival time distribution. All other experiments use a step wave velocity of 300 ms and height of 15 V.

A) Trap Bias: 45  
IMS Wave Velocity: 600  
IMS Wave Height: 40

B) Trap Bias: 32  
IMS Wave Velocity: 600  
IMS Wave Height: 40

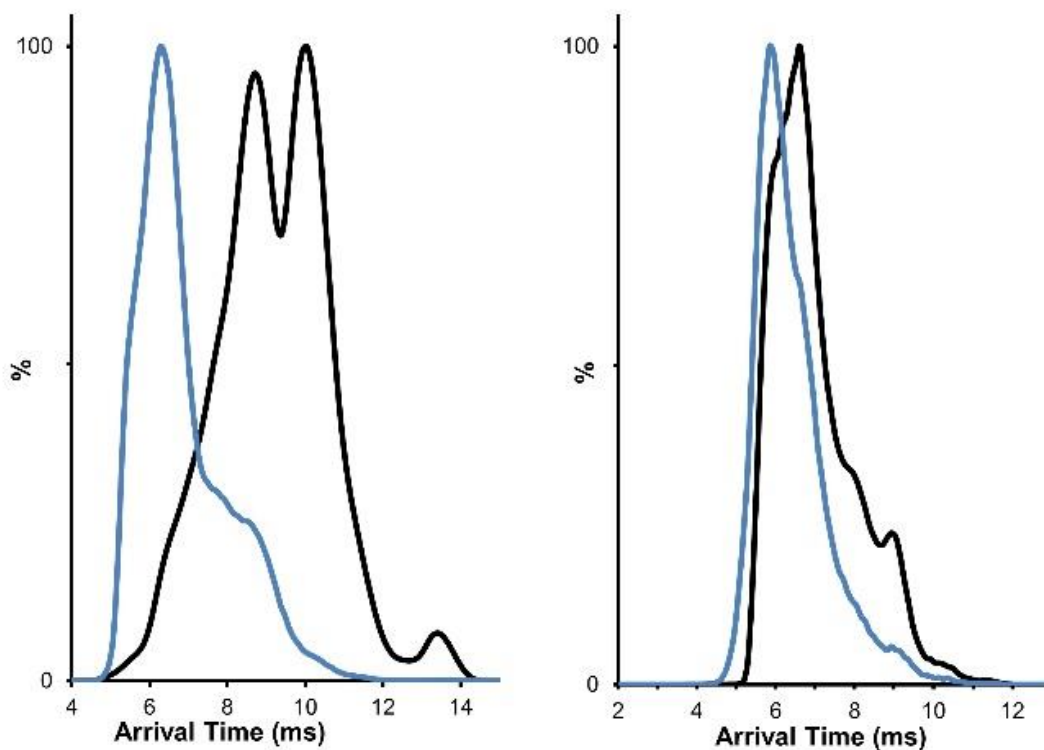

Figure S4: The arrival time distribution of cyt *c*'s 7+ charge state showing a structural compaction remains even in the softest conditions. For each spectrum, the black trace is before exposure to H<sub>2</sub>O<sub>2</sub> and the blue trace is 30 minutes after H<sub>2</sub>O<sub>2</sub> exposure. (A) Has a trap bias of 45 with the IMS wave velocity of 600 m/s and IMS wave height of 40. Before H<sub>2</sub>O<sub>2</sub> exposure three distinct conformers are observed. (B) Decreasing the trap bias to 32 and keeping the same IMS wave velocity and height two distinct conformers are observed.

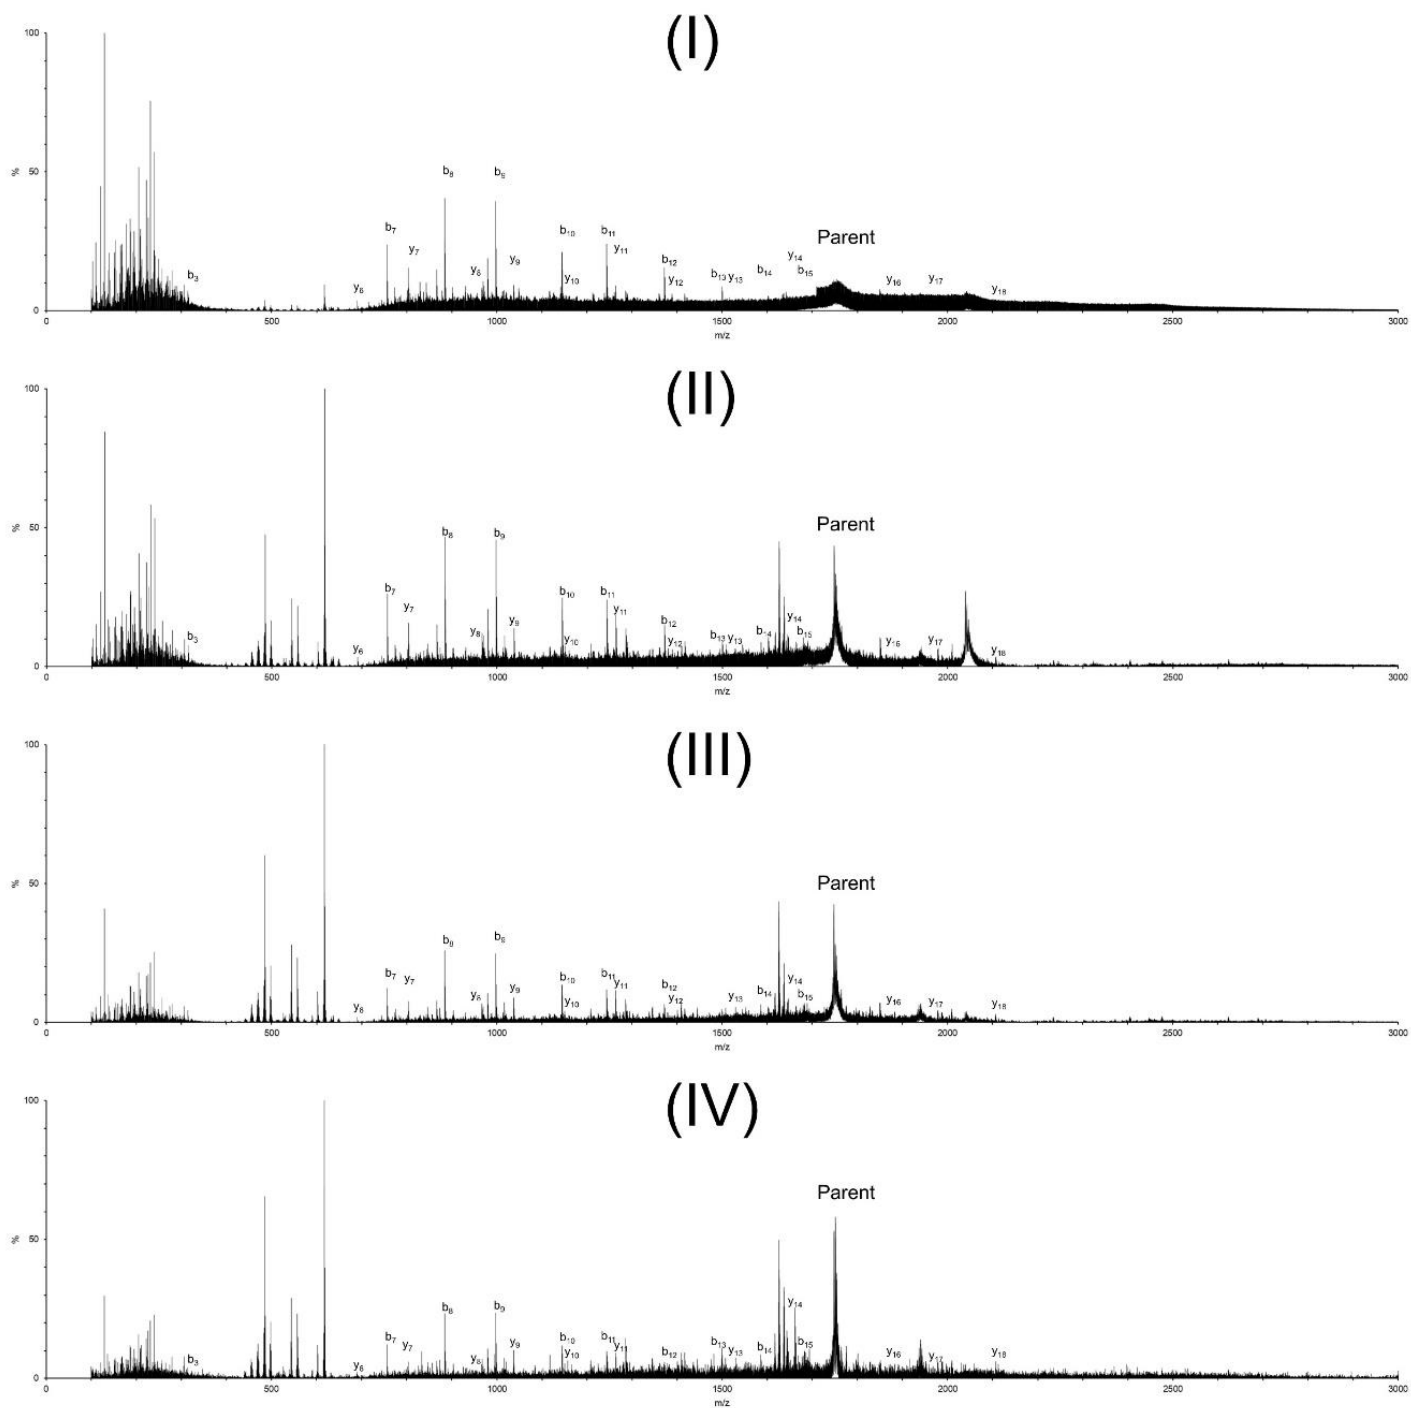

Figure S5: Ions produced using CID in transfer cell following IMS separation for each conformer. Most intense singly charged b and y ions are labeled. Multiply charged ions are not labeled.

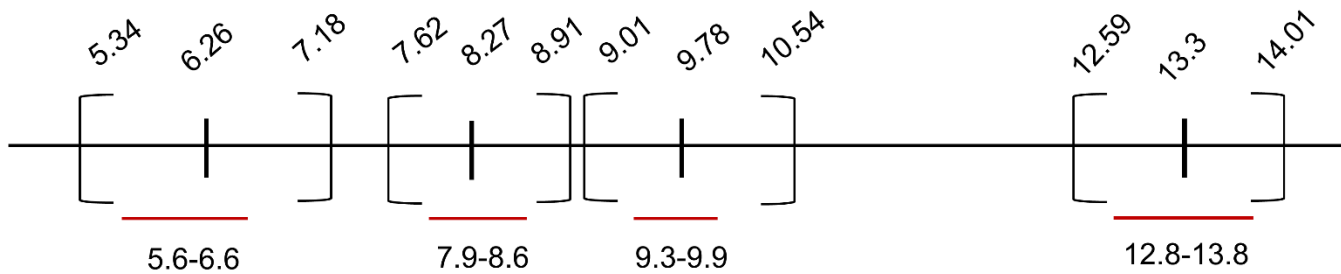

Figure S6: Gaussian distributions of the arrival time distribution (units labeled in ms) for each conformer of cyt c calculated in Origin. The gaussian center (vertical line) and width at half max (depicted in brackets) are labeled for each conformer. The area selected for mass analysis is labeled with the red line.

### Conformation Shift of Cyt c After H<sub>2</sub>O<sub>2</sub> Exposure

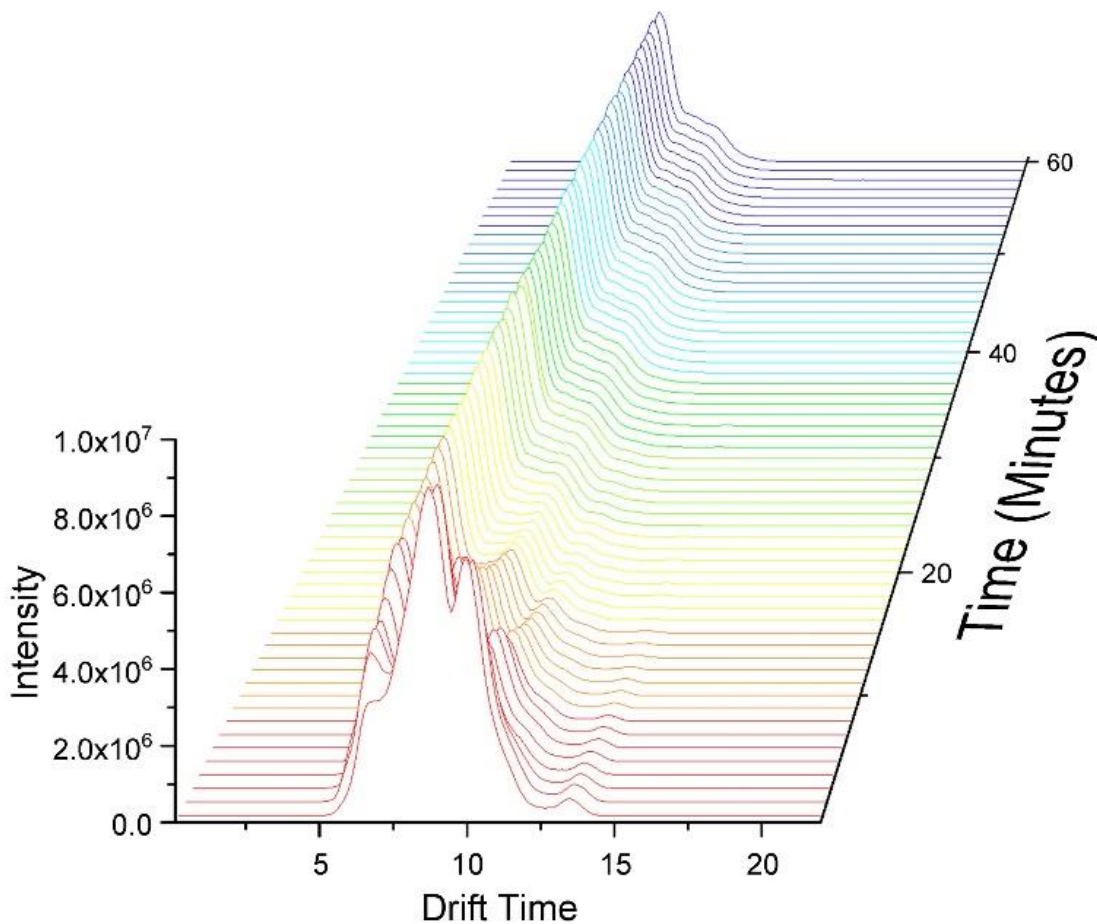

Figure S7: Arrival time distribution of 7+ charge state of cyt c after being exposed to 1 mM H<sub>2</sub>O<sub>2</sub>. First acquisition was collected 3 minutes after H<sub>2</sub>O<sub>2</sub> exposure, and a new acquisition was collected for 30 seconds every minute for 60 minutes.

**Table S1.** Distance of the modified residues to the heme or Y67. The shortest distance of each modified residue to the Heme center or Y67 is found using pymol. The Extent of modification for the H<sub>2</sub>O<sub>2</sub> control and after laser irradiation (Sample). By subtracting the control from sample the extent of FPOP modification is calculated. Modifications detected with bottom-up proteomics for each residue is listed.

| Modified Residue | Distance to Heme (Å) | Distance to Y67 (Å) | Control GeoMean | Control GSD | Sample GeoMean | Sample GSD | FPOP GeoMean | %FPOP GSD | Modifications Detected |
|------------------|----------------------|---------------------|-----------------|-------------|----------------|------------|--------------|-----------|------------------------|
| H26              | 12.8                 | 14.9                | 0.3703          | 0.0661      | 2.1361         | 1.092      | 1.7659       | 1.094     | +16, +5, -23, -22      |
| K27              | 11                   | 15.7                | 0.026           | 0.0129      | 0.2525         | 0.2026     | 0.2265       | 0.203     | +14, +16               |
| P30              | 7.5                  | 9.4                 | 0.0042          | 0.0017      | 0.017          | 0.0044     | 0.0128       | 0.0047    | +14, +16               |
| N31              | 10.8                 | 13.8                | 0.0046          | 0.0022      | 0.0158         | 0.0039     | 0.0112       | 0.0045    | +16                    |
| L32              | 8                    | 10.6                | 0.0046          | 0.0025      | 0.0179         | 0.0056     | 0.0133       | 0.0061    | +14, +16               |
| H33              | 16.9                 | 19                  | 0.0299          | 0.0084      | 0.082          | 0.0384     | 0.0521       | 0.0393    | +16, -23, -22, +5, -10 |
| L35              | 10.5                 | 11.2                | 0.0018          | 0.0003      | 0.0106         | 0.0027     | 0.0087       | 0.0027    | +14, +16               |
| F36              | 12.7                 | 13.1                | 0.0786          | 0.0265      | 0.1328         | 0.0745     | 0.0542       | 0.079     | +48, +32, +16          |
| R38              | 14                   | 13.7                | 0.0054          | 0.0013      | 0.0124         | 0.0024     | 0.007        | 0.0027    | +16, -43               |
| K39              | 17.1                 | 14.6                | 0.0022          | 0.0016      | 0.0439         | 0.0268     | 0.0417       | 0.0016    | +16, -1                |
| Q42              | 14.9                 | 13.3                | 0.0069          | 0.0012      | 0              | 0          |              |           | +16                    |
| A43              | 13.3                 | 13.9                | 0.005           | 0.0018      | 0.0299         | 0.0302     | 0.0248       | 0.0303    | +16, +14               |
| P44              | 16.7                 | 17.6                | 0.0046          | 0.0041      | 0.0175         | 0.016      | 0.0129       | 0.0166    | +16, +14               |
| F46              | 8.2                  | 9.8                 | 0.0192          | 0.0117      | 0.0674         | 0.0221     | 0.0483       | 0.025     | +48, +32, +16          |
| Y48              | 9.4                  | 9.6                 | 0.0497          | 0.0205      | 0.0868         | 0.0257     | 0.0371       | 0.0329    | +48, +32, +16          |
| D50              | 16.5                 | 13.7                | 0.0104          | 0.0092      | 0.0956         | 0          | 0.0852       | 0.0092    | +16                    |
| A51              | 12.8                 | 9.1                 | 0.0043          | 0.0012      | 0.0738         | 0          | 0.0695       | 0.0012    | +16                    |
| N52              | 8.1                  | 6.7                 | 0.0048          | 0.0012      | 0.3354         | 0          | 0.3306       | 0.0012    | +16                    |
| K53              | 14.8                 | 13                  | 0.0378          | 0           | 0.3737         | 0.0309     | 0.3359       | 0         | +16, -1                |
| W59              | 9.8                  | 7.5                 | 0.5839          | 0.2685      | 0.1807         | 0.0322     |              |           | +48, +16               |
| E61              | 16.9                 | 16.1                | 0.3251          | 0.2199      | 0.1397         | 0.0344     |              |           | +16                    |
| E62              | 18.8                 | 16.4                | 0.3251          | 0.2199      | 0.1089         | 0.0242     |              |           | +16                    |
| L64              | 10.8                 | 9.5                 | 0.6397          | 0.0113      | 0.1038         | 0.0406     |              |           | +16                    |
| M65              | 15.2                 | 14                  | 1.1067          | 0.1961      | 0.2904         | 0.7323     |              |           | +16                    |
| Y67              | 4.8                  | NA                  | 0.7467          | 0.4338      | 0.1568         | 0.479      |              |           | +48, +16               |
| K72              | 10.9                 | 8                   | 8.0236          | 0           | 6.9208         | 0          |              |           | -1                     |
| K73              | 16.5                 | 12.7                | 8.0236          | 0           | 6.9208         | 0          |              |           | -1                     |
| M80              | 2.3                  | 3.1                 | 12.6563         | 3.6598      | 18.0497        | 20.1586    | 5.3935       | 4.2136    | +32, +16               |
| I81              | 9.1                  | 9.8                 | 0.6068          | 0.4636      | 7.0608         | 9.4496     | 6.4541       | 4.4195    | +16, +14               |
| E92              | 17.8                 | 17.6                | 0               | 0           | 0.0096         | 0          | 0.0096       | 0         | -28                    |
| D93              | 16.8                 | 18.1                | 0               | 0           | 0.0096         | 0          | 0.0096       | 0         | -28                    |
| I95              | 12.1                 | 11.9                | 0               | 0           | 0.0115         | 0          | 0.0115       | 0         | +14                    |
| A96              | 16.2                 | 17.7                | 0               | 0           | 0.0133         | 0.0094     | 0.0133       | 0.0094    | +16                    |
| Y97              | 14                   | 17.5                | 0.0017          | 0           | 0.1754         | 0.027      | 0.1737       | 0.027     | +48, +32, +16          |
| L98              | 10.9                 | 12.5                | 0               | 0           | 0.0056         | 0          | 0.0056       | 0         | +16, +14               |



**Table S2.** Conditions for native MS analysis.

---

|                           |     |
|---------------------------|-----|
| Capillary (kV)            | 1.8 |
| Source Temperature (°C)   | 50  |
| Sampling Cone             | 30  |
| Trap Collision Energy     | 4   |
| Transfer Collision Energy | 6   |
| IMS Wave Velocity (m/s)   | 600 |
| IMS Wave Height (V)       | 40  |

---
